# Supplementary material for: The mitochondrial genome of Globodera ellingtonae is composed of two circles with segregated gene content and differential copy numbers
Source: PubMed Central journal article supplement (PMC5011991; doi:10.1186/s12864-016-3047-x), 2016-09-05

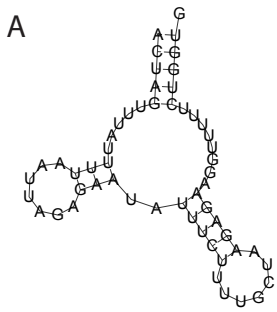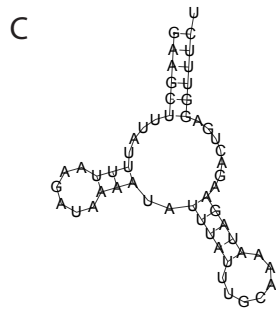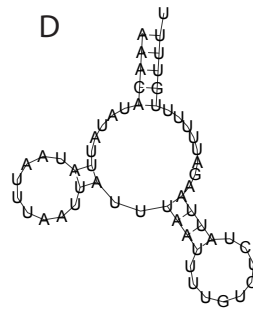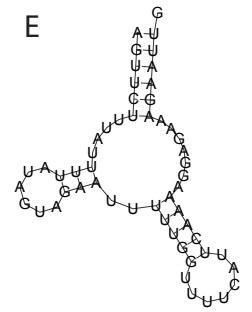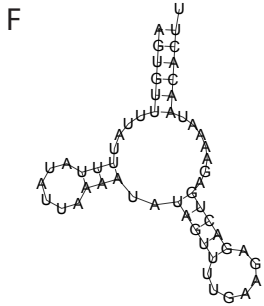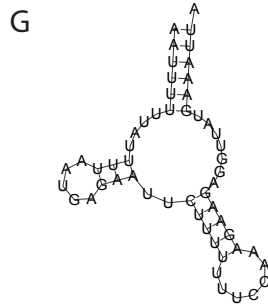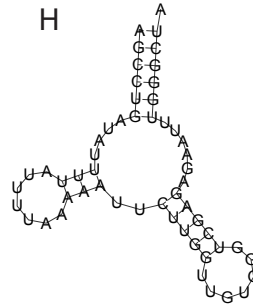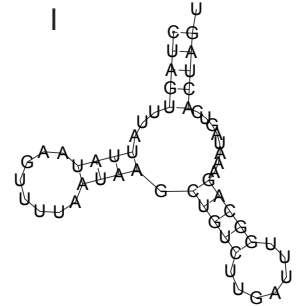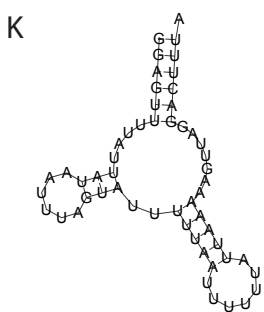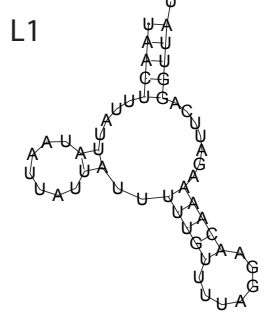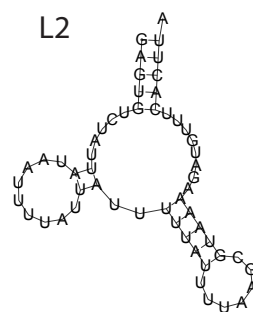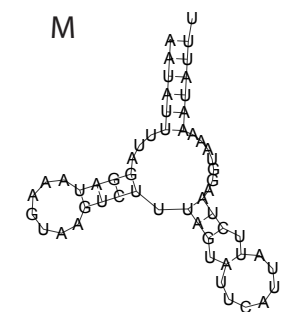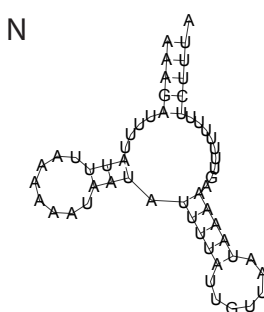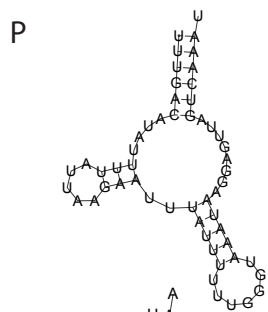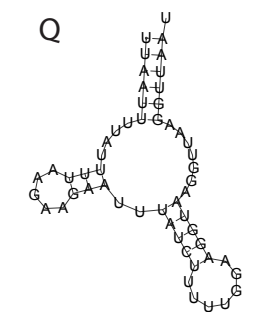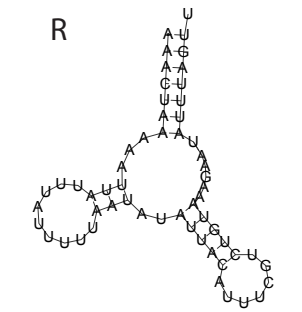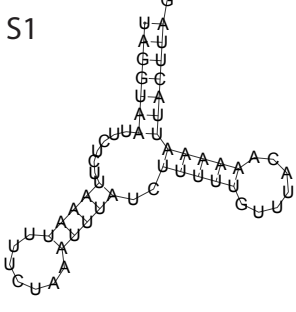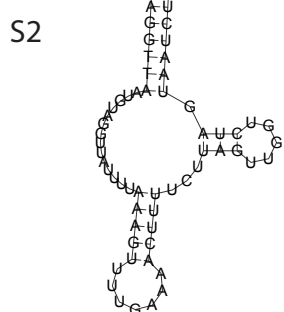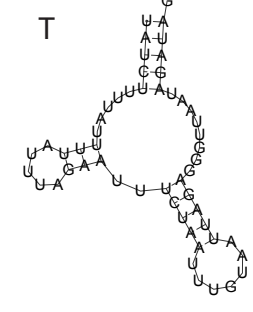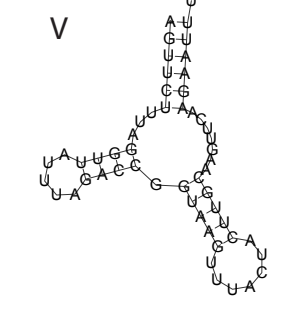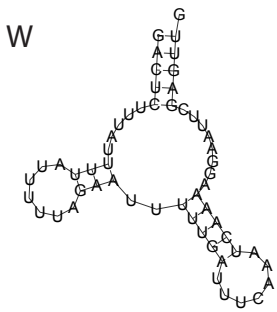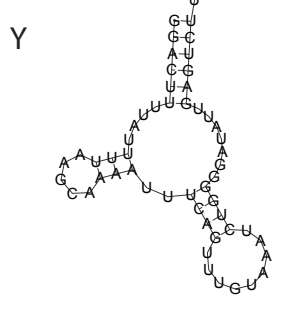

\*S2 alternate conformation

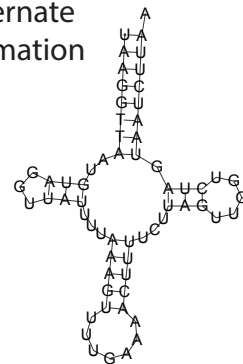

Supplement: 12864_2016_3047_MOESM1_ESM.pdf [file 12864_2016_3047_MOESM1_ESM.pdf]
